# Supplementary material for: Novel cross-linkers for PDMS networks for controlled and well distributed grafting of functionalities by click chemistry
Source: Royal Society of Chemistry journal article supplement (doi:10.1039/c2py20966g), 2012-12-17
Supplement: c2py20966g.pdf [file c2py20966g.pdf]

## Supporting Information

### Novel cross-linkers for PDMS networks for controlled and well distributed grafting of functionalities by click chemistry

Frederikke Bahrt Madsen, Ivaylo Dimitrov, Anders Egede Daugaard, Søren Hvilsted and Anne Ladegaard Skov

Danish Polymer Center, Department of Chemical and Biochemical Engineering, Technical University of Denmark, Building 227, 2800 Kgs. Lyngby, Denmark

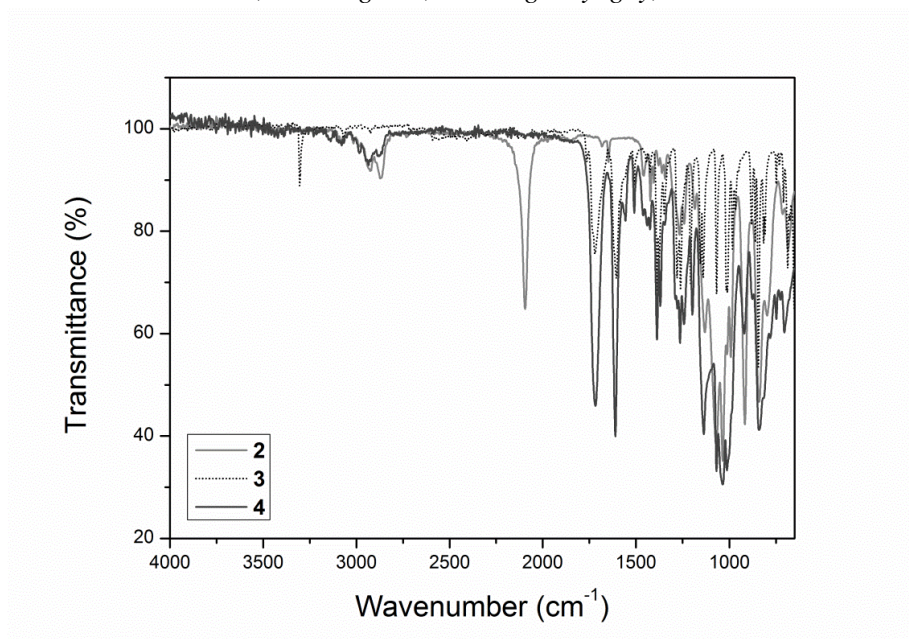

Figure S1: FTIR spectra of azide cross-linker (2), alkyne (3) and click product (4).

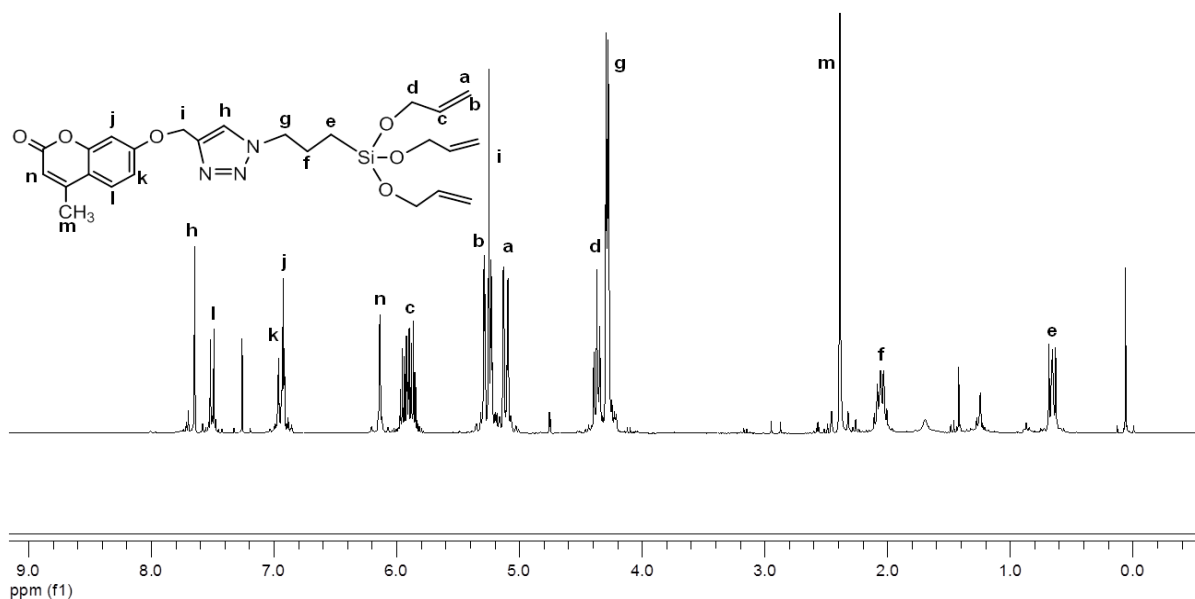

Figure S2: <sup>1</sup>H-NMR spectrum of 4 showing the formation of the triazole proton (h).

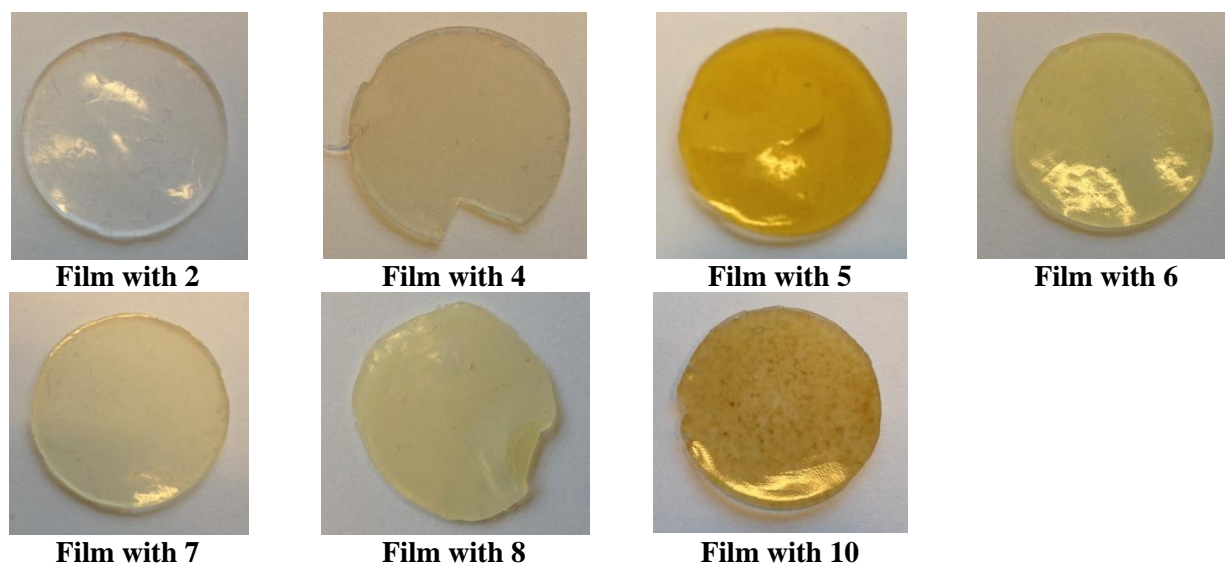

Figure S3: Photos of prepared films.

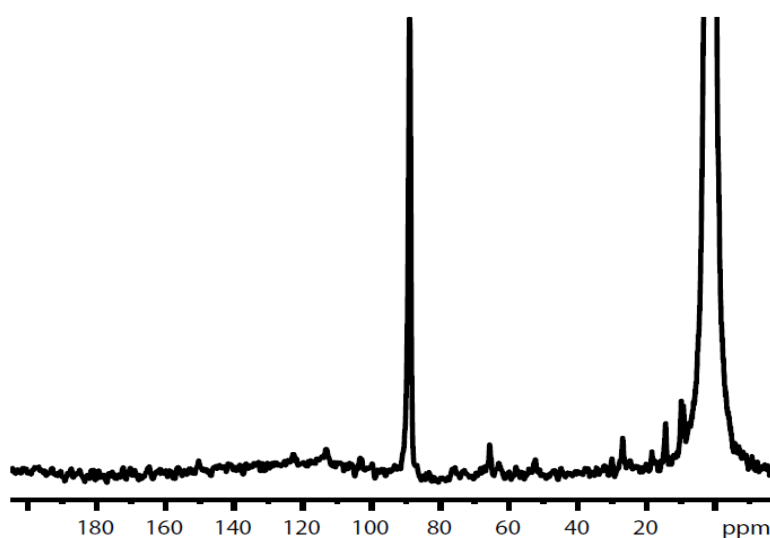

Figure S4:  $^{13}\text{C}$ -NMR solid state spectrum of film with 4. A Peak at 89 ppm corresponding to  $\sim 2\%$  of the  $\text{Si-CH}_3$  signal at 1 ppm could not be assigned and are probably due to some impurity in the network.

## Mechanical Characterization

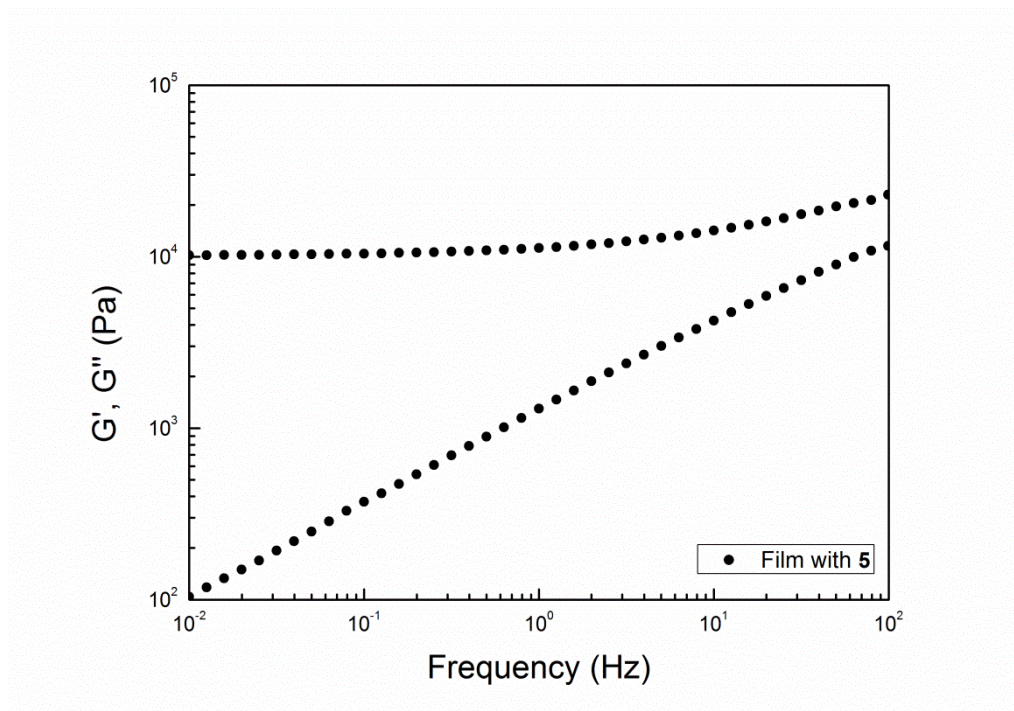

Figure S5: Storage modulus ( $G'$ ) and loss modulus ( $G''$ ) as functions of frequency for film prepared with 5.

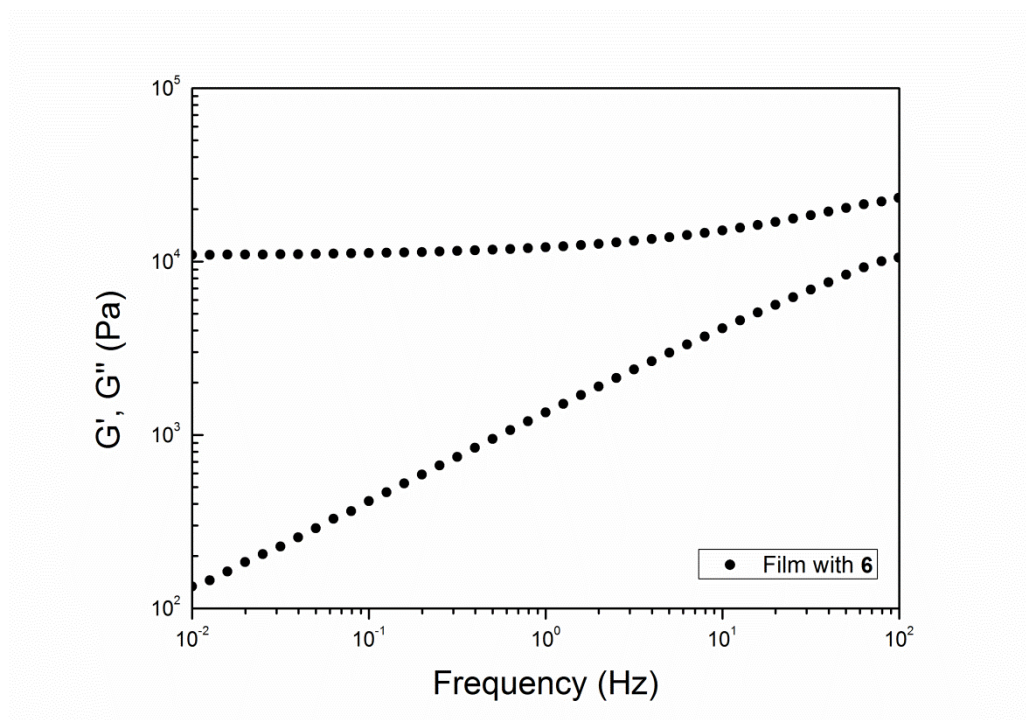

Figure S6: Storage modulus ( $G'$ ) and loss modulus ( $G''$ ) as functions of frequency for film prepared with 6.

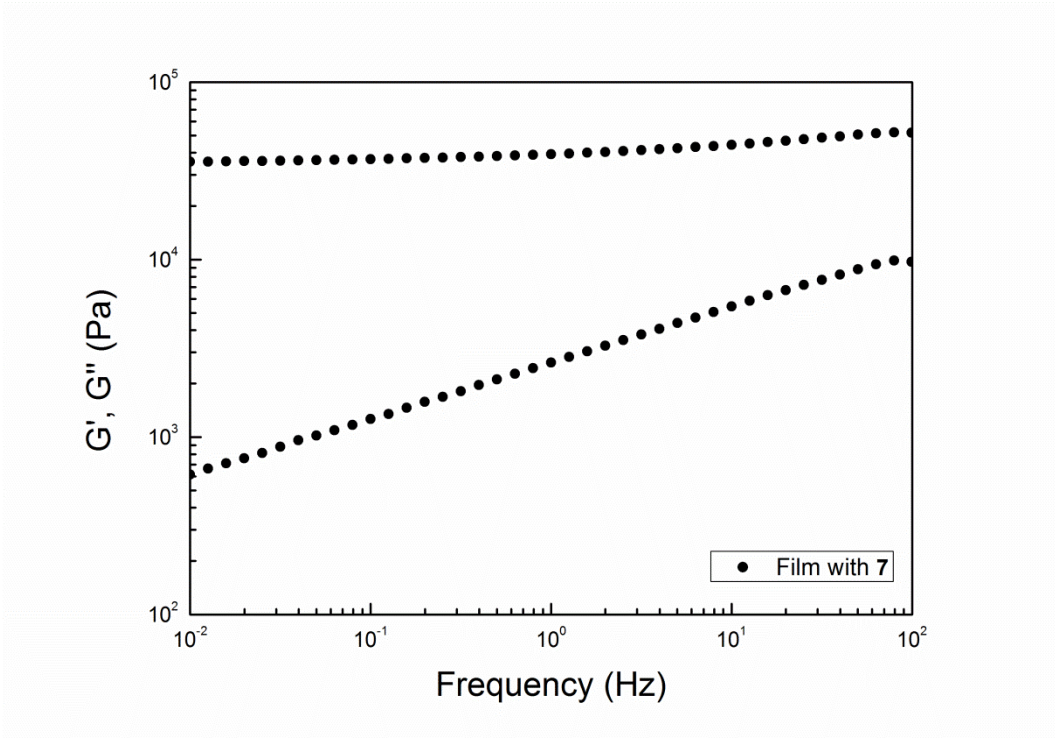

Figure S7: Storage modulus ( $G'$ ) and loss modulus ( $G''$ ) as functions of frequency for film prepared with 7.

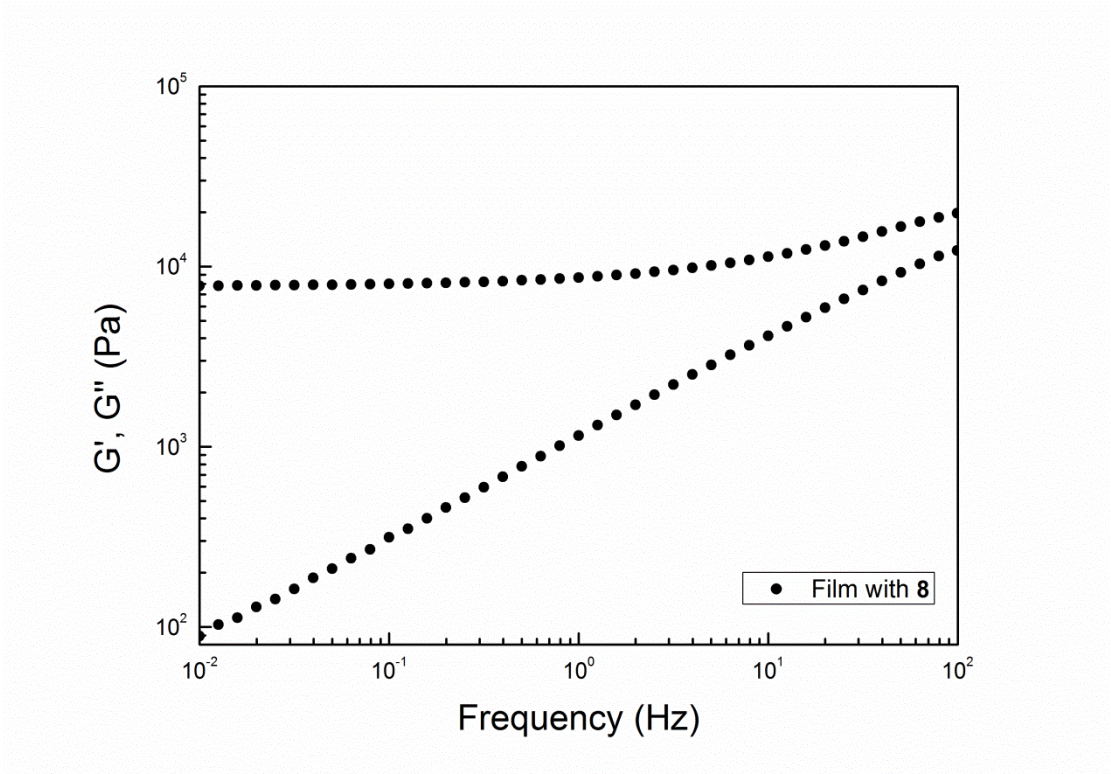

Figure S8: Storage modulus ( $G'$ ) and loss modulus ( $G''$ ) as functions of frequency for film prepared with 8.

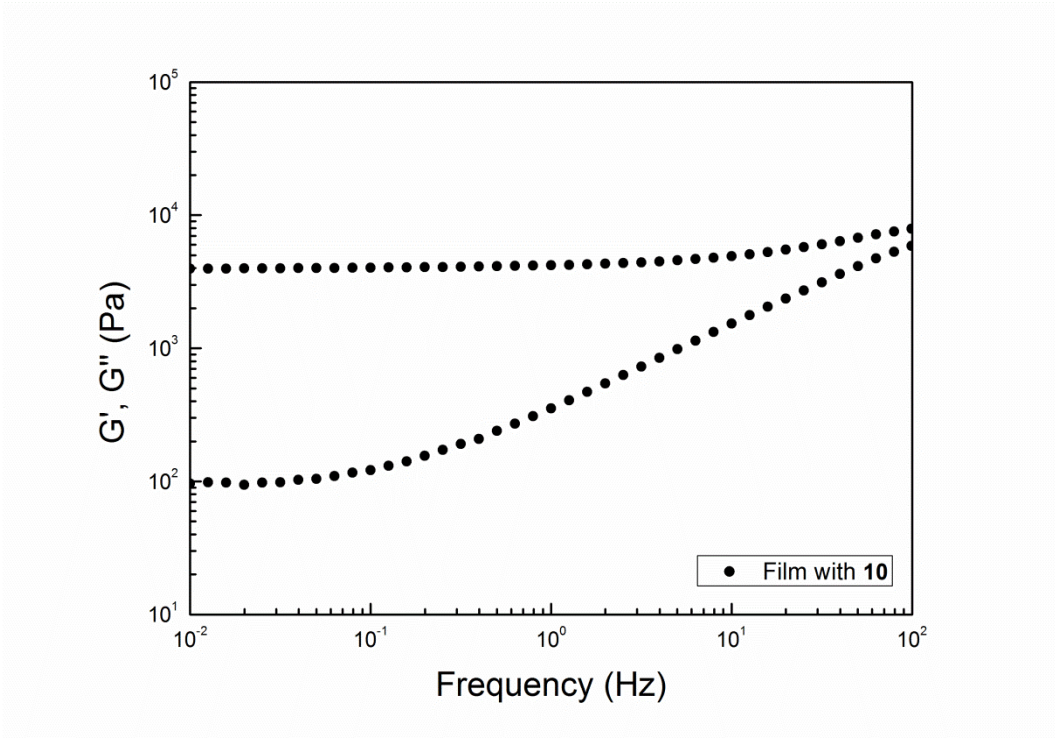

**Figure S9:** Storage modulus ( $G'$ ) and loss modulus ( $G''$ ) as functions of frequency for film prepared with 10.
